# Supplementary material for: MDA-9/Syntenin in the tumor and microenvironment defines prostate cancer bone metastasis
Source: PubMed Central journal article supplement — Proc Natl Acad Sci U S A. 2023 Nov 3;120(45):e2307094120. doi: 10.1073/pnas.2307094120 (PMC10636346; doi:10.1073/pnas.2307094120), 2023-11-03
Supplement: pnas.2307094120.sapp.pdf [file pnas.2307094120.sapp.pdf]

## Supplementary Figure Legends

**Supplementary Fig. S1.  $\mu$ CT quantification of cortical and trabecular bone.** 2 month-old WT and *mda-9<sup>-/-</sup>* mice were given intracardiac (I.C.) injection of murine PC cells (RM1-BM-*Luc*, Experiment 1A). Femurs were harvested 10-days post injection and  $\mu$ CT analysis was conducted. N = 6 legs/condition; ANOVA-Tukey  $p < 0.05$  using SEM. Groups not sharing a letter are statistically significant.

**Supplementary Fig. S2.** A summary of “death” and “metastatic events” from bone marrow transfusion studies (From Fig. 1E) are tabulated. “ $\pm$ ” weakly positive.

**Supplementary Fig. S3. A)** Blots from antibody-based arrays showing differential expression levels of various chemokines in tumor-bearing serum isolated from WT vs *mda-9<sup>-/-</sup>* animals. **B)** Bone marrow (BM) cells were isolated from WT and *KO (mda-9<sup>-/-</sup>)* mice and stimulated with different murine tumor cell-derived conditioned media, C2-TRAMP or B6CaP, for 12 hr. Total cellular RNA was extracted, and qPCR was performed to detect mouse CXCL5 mRNA. Data is presented as fold-change relative to the unstimulated wild type (BM<sup>WT</sup>) group. Different letters in two variables are statistically significant ( $p < 0.05$ ). **C)**  $3 \times 10^4$  RM1-BM-*Luc* cells were injected by the intracardiac (I.C.) route into WT and *mda-9<sup>-/-</sup>* mice. 14-day post-injection, total BM cells were isolated and stained for Macrophage (CD45<sup>+</sup>CD11b<sup>+</sup>), NK cell (CD45<sup>+</sup>NK1.1<sup>+</sup>), Dendritic Cell (CD45<sup>+</sup>CD11b/c<sup>+</sup>) and intracellular CXCL5 expression for identifying the specific cell population(s) that differentially respond to tumor cells. Percentages of CXCL5 expression in different populations is presented. **D)** Bone marrow-derived mesenchymal stromal cells (BM-MSCs) were isolated from WT and *mda-9<sup>-/-</sup>* mice and stimulated with tumor cell-derived conditioned media for 12 hrs. Total cellular RNA was extracted, and qPCR was performed to detect mouse *CXCL10* and *CCL11* mRNA. Data is presented as fold change relative to the unstimulated wild type (BM-MSC<sup>WT</sup>) group. \* $p < 0.05$ . “ns”: non-significant.

**Supplementary Fig. S4. Therapeutic potential of Anti-CXCL5.**  $1 \times 10^4$  RM1-BM-*Luc* cells were surgically implanted in the left femur and treated with control or anti-CXCL5 (three doses) within the first three days. **A)** Mice were imaged weekly and luciferase intensity was calculated using a built-in Living Image Software v.2.50. Representative photographs at day-7 and -14 are presented. **B)** Calculated ROI is presented. **C)** Changes of BLI intensity during two weeks of tumor growth of individual mice are graphically presented. Red Circle: Control

Antibody; Blue square: Anti-CXCL5. Solid line from each group is the average value from 7 animals. \* Statistically significant.

**Supplementary Figure S5.** A) Expression of MDA-9/Syntenin in PC-3ML and its knockout clones. B) HS5 cells were incubated with normalized (equal amount of total protein) tumor cell-derived condition media for 12 hrs. Total RNA was extracted from HS5-cells and analyzed for CXCL5 levels using qPCR. Different letters in two variables are statistically significant ( $p < 0.05$ ). C) Schematic presentation of the Hippo signaling pathway.

**Supplementary Fig. S6.** A) Blots from antibody-based arrays showing differential expression levels of various growth factors in tumor cell-derived conditioned media. B) HS5 cells were incubated with GM-CSF or IGFBP4 for 12 hrs. Total RNA was extracted from HS5-cells and analyzed for CXCL5 levels using qPCR. Different letters in two variables are statistically significant ( $p < 0.05$ ).

**Supplementary Figure S7.** A) HS5 cells were incubated with GM-CSF for the indicated time points. CXCL5 secretion was analyzed by ELISA. B) HS5 cells were cultured with indicated PC3-ML conditioned media fractions in the presence or absences of Anti-PDGF-AA for 24 hrs. after initial transfection with a *CXCL5*-Prom. Luciferase activity was measured and presented after normalizing with *Renilla luciferase*. \* $p < 0.05$ . C) PC-3ML cells were treated with commercially available pathway inhibitors and conditioned media were analyzed for PDGF-AA expression. Different letters in two variables are statistically significant ( $p < 0.05$ ).

**Supplementary Figure S8.** BM-MSCs isolated from WT or KO mice were stimulated with mouse PDGF-AA and *CXCL10* and *CCL11* expression was determined using qPCR. Different letters in two variables are statistically significant ( $p < 0.05$ ).

**Maji *et al.*, Supplementary Fig. S1**

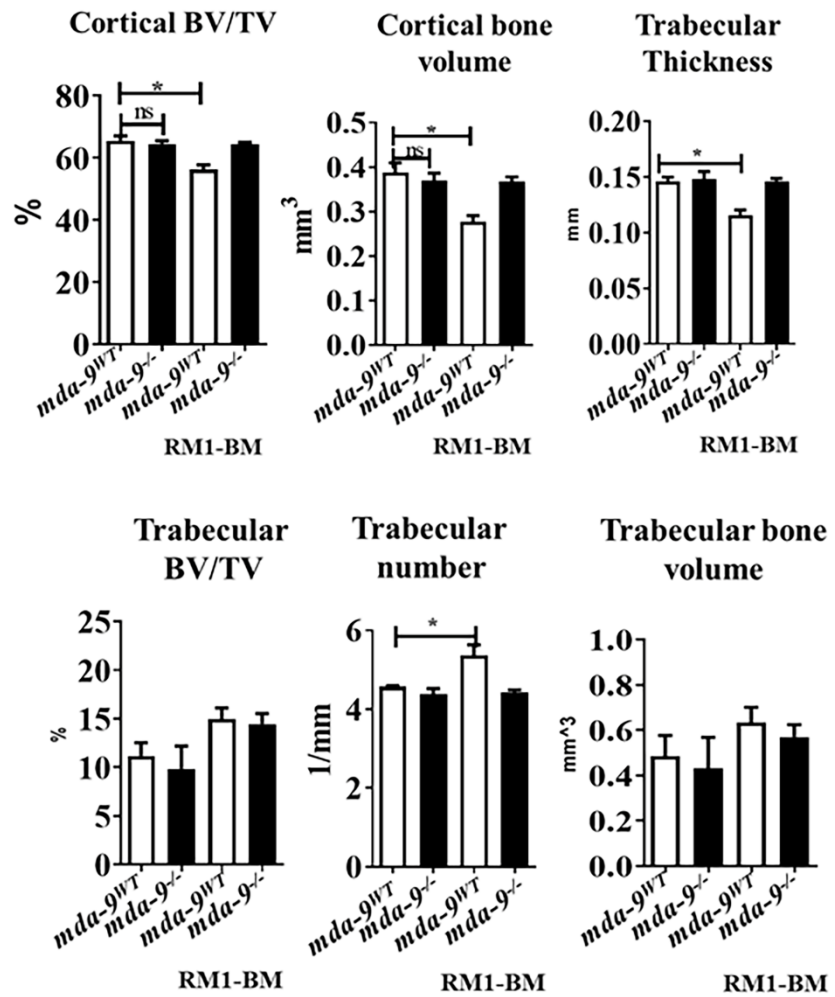

**Maji *et al.*, Supplementary Fig. S2**

| Donor            | Recipient                  | Death by Day 11 | Metastatic site(s) (no. of animals examined on Day 12 (BLI)) |
|------------------|----------------------------|-----------------|--------------------------------------------------------------|
| Sham Transfusion | <i>mda-9<sup>WT</sup></i>  | 2               | Liver (1/3); Bone (1/3)                                      |
| BM <sup>WT</sup> | <i>mda-9<sup>WT</sup></i>  | 2               | Liver (3/3); Bone (1/3)                                      |
| Sham Transfusion | <i>mda-9<sup>-/-</sup></i> | 0               | Liver (±1/5); Bone (0/5)                                     |
| BM <sup>WT</sup> | <i>mda-9<sup>-/-</sup></i> | 2               | Liver (1/3); Bone (2/3)                                      |

Maji *et al.*, Supplementary Fig. S3

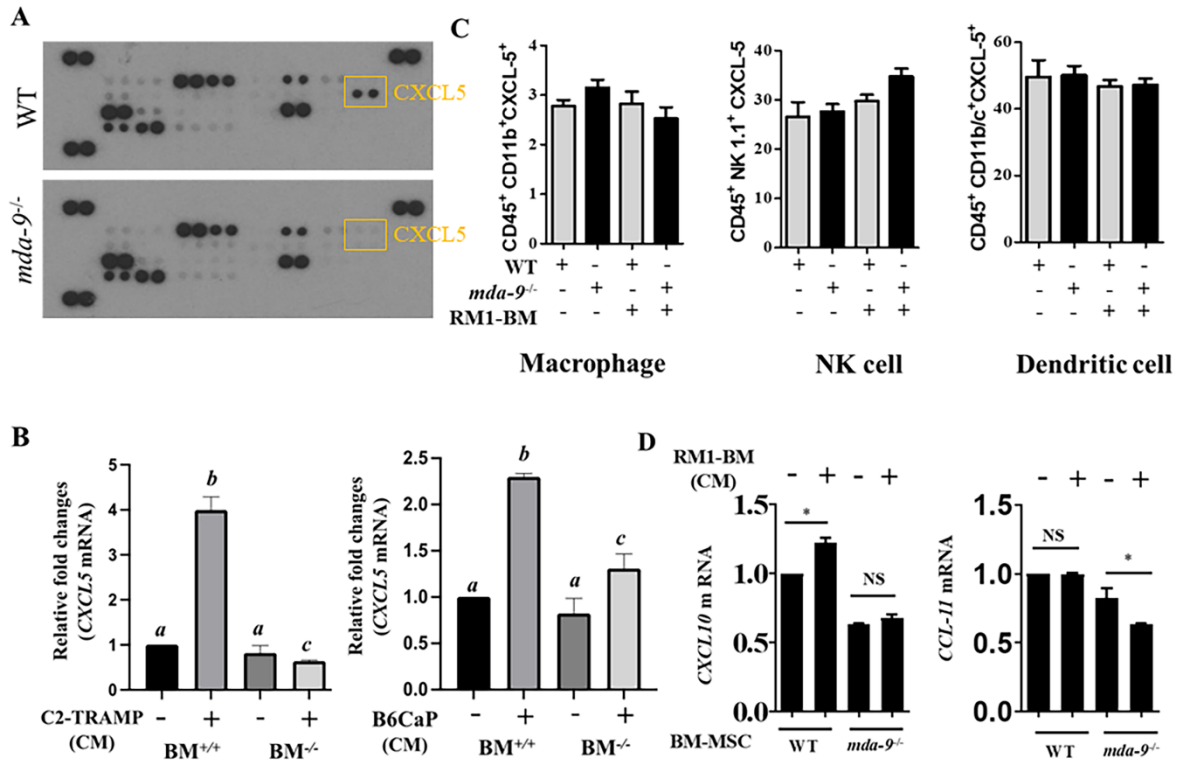

Maji *et al.*, Supplementary Fig. S4

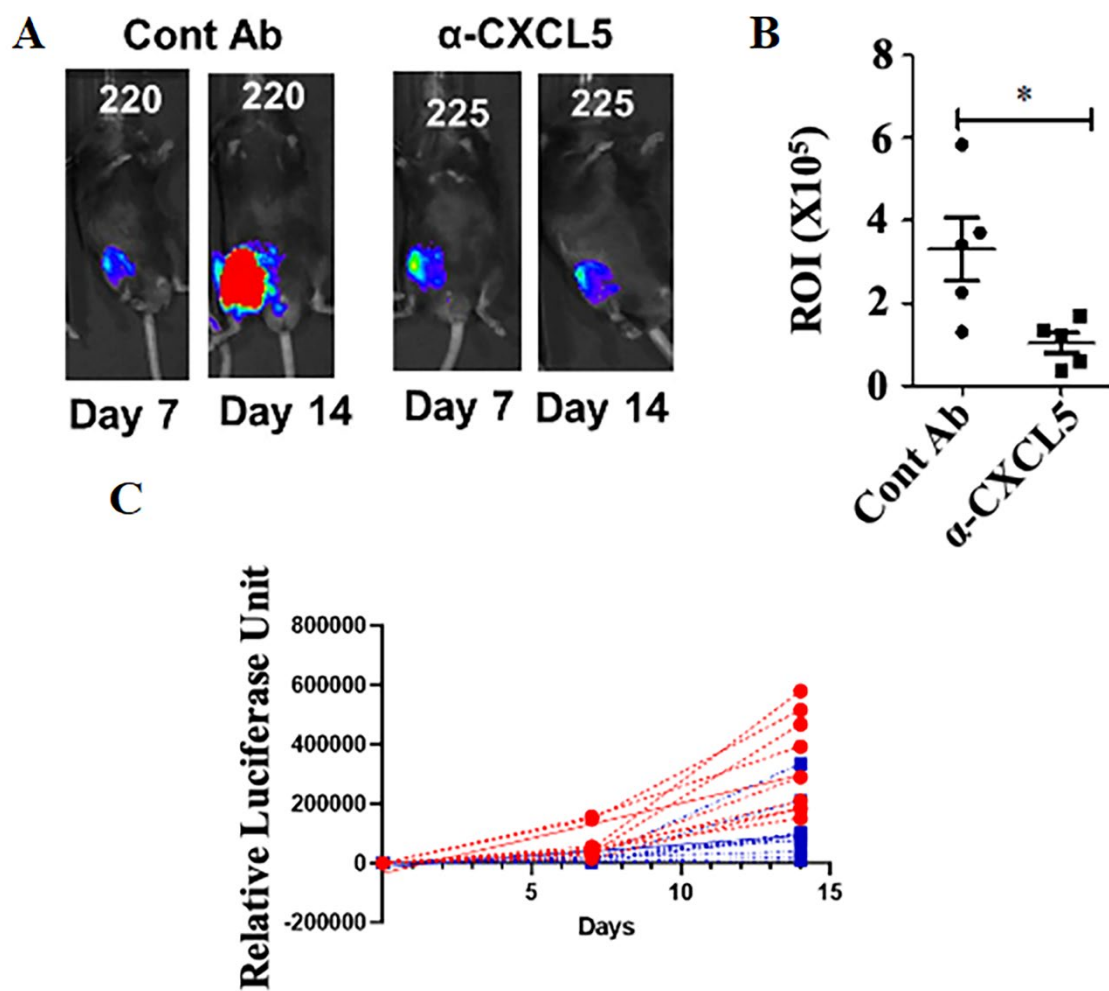

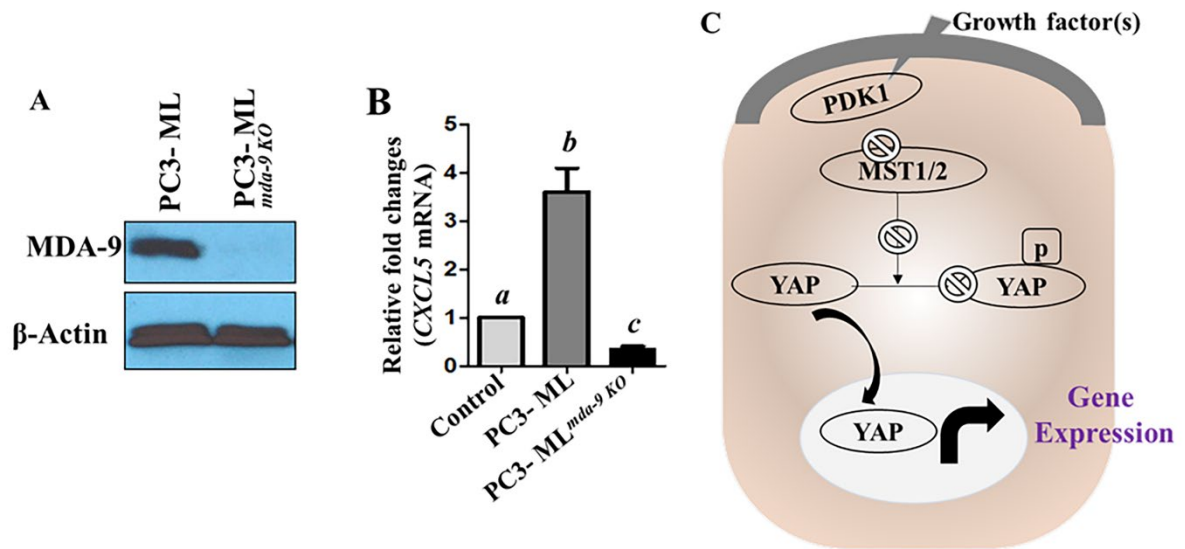

A

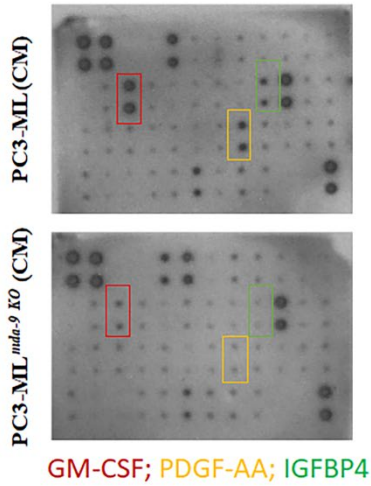

B

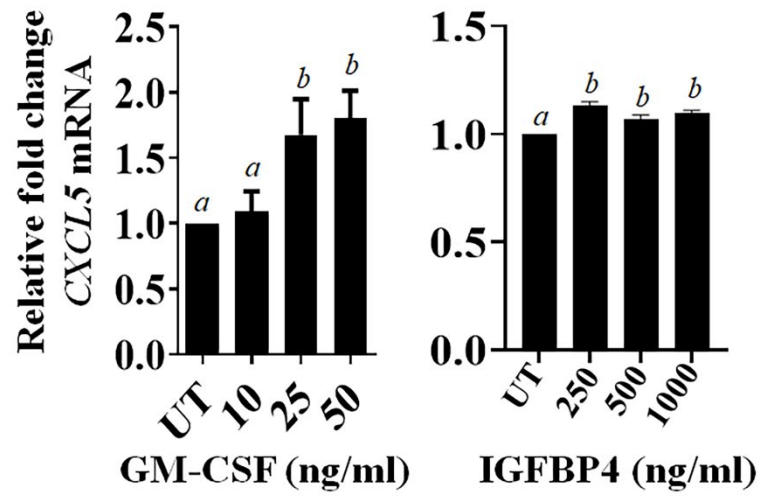



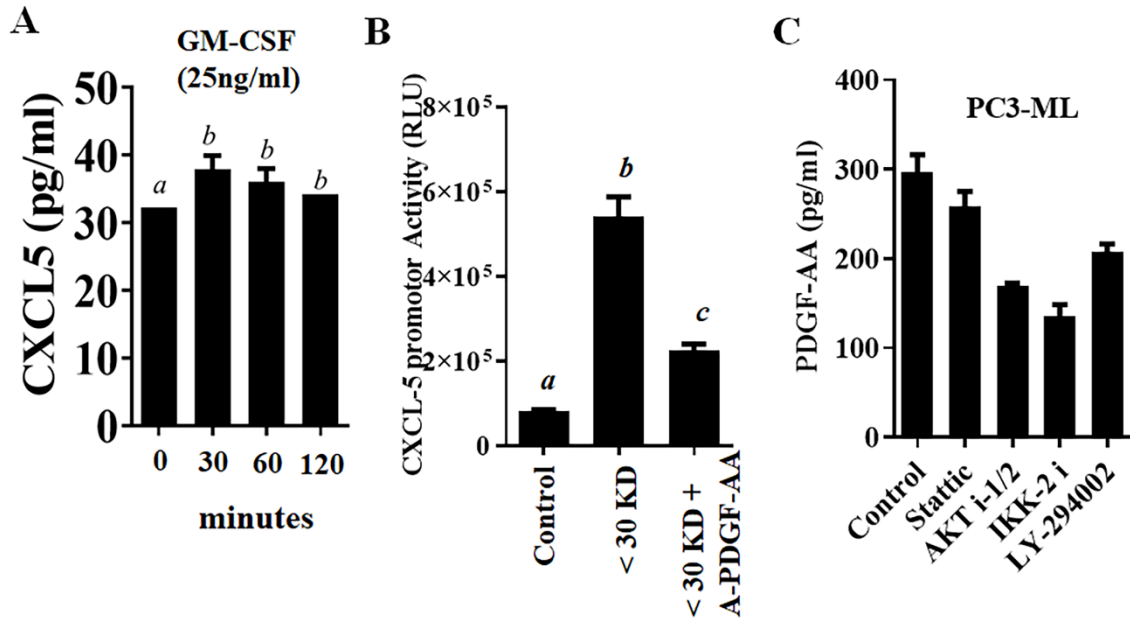

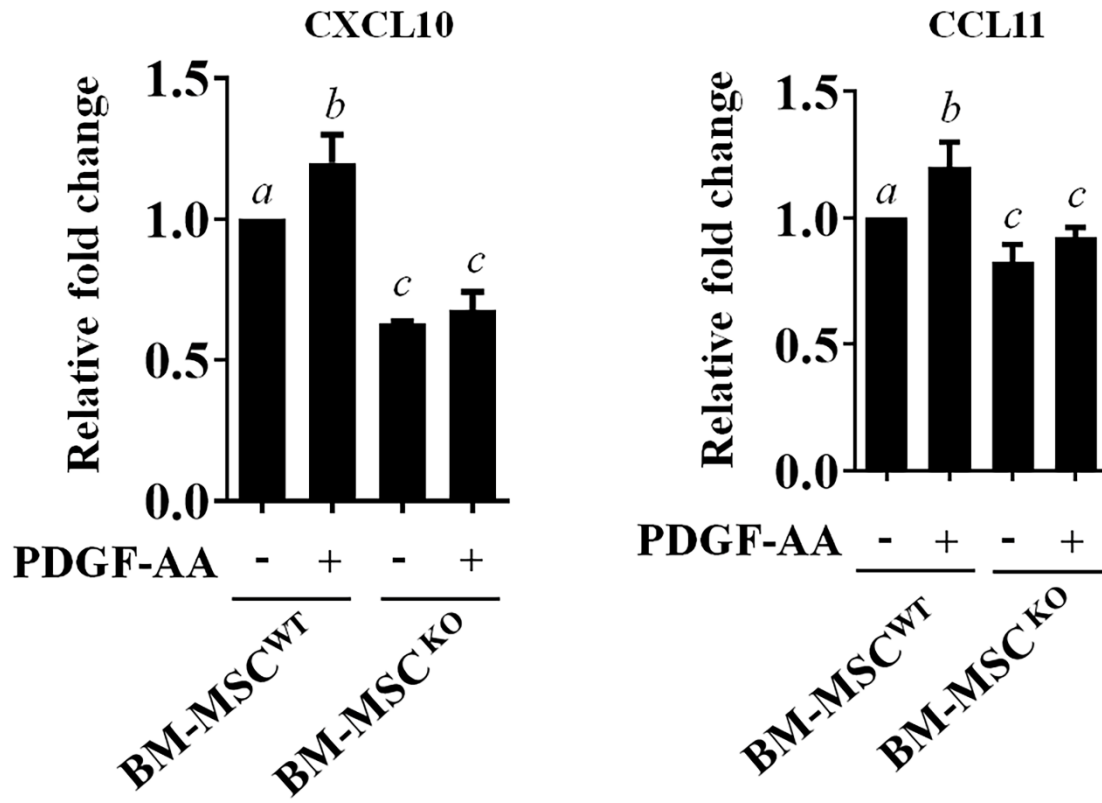

## Supplementary Tables

**Supplementary Table S1. Proteome Profiler TM Array: Mouse Chemokine Array (ARY020)**

| <b>Chemokine Array</b> |                             |                               |
|------------------------|-----------------------------|-------------------------------|
| <b>Coordinate</b>      | <b>Analyte/Control</b>      | <b>Alternate Nomenclature</b> |
| A1, A2, A19, A20       | Reference Spots N/A         | RS                            |
| B3, B4                 | 6Ckine                      | CCL21, SLC, Exodus-2          |
| B5, B6                 | BLC                         | CXCL13, BCA-1                 |
| B7, B8                 | C10                         | CCL6, MRP-1                   |
| B9, B10                | Complement Component C5/C5a | C5/C5a                        |
| B11, B12               | CCL28                       | MEC                           |
| B13, B14               | Chemerin                    | RARRES2                       |
| B15, B16               | CTACK                       | CCL27, ALP, ILC, ESkin        |
| B17, B18               | CXCL16                      | SRPSOX                        |
| C3, C4                 | Eotaxin                     | CCL11                         |
| C5, C6                 | Fractalkine                 | CX3CL1                        |
| C7, C8                 | IL-16                       | _____                         |
| C9, C10                | IP-10                       | CXCL10, CRG-2, C7             |
| C11, C12               | I-TAC                       | CXCL11, H174, SCYB9B          |
| C13, C14               | JE                          | CCL2, MCP-1                   |
| C15, C16               | KC                          | CXCL1                         |
| C17, C18               | LIX                         | GCP-2, ENA-78                 |
| D3, D4                 | MCP-2                       | CCL8, HC14                    |
| D5, D6                 | MCP-5                       | CCL12                         |
| D7, D8                 | MDC                         | CCL22, ABCD-1                 |

|          |                                       |                                   |
|----------|---------------------------------------|-----------------------------------|
| D9, D10  | MIG                                   | CXCL9, CRG-10, CMK                |
| D11, D12 | MIP-1 $\alpha/\beta$ (pan)            | CCL3/CCL4                         |
| D13, D14 | MIP-1 $\gamma$                        | CCL9/10, CCF18, MRP-2             |
| D15, D16 | MIP-2                                 | CXCL2, GRO $\beta$ , GRO2, CINC-3 |
| D17, D18 | RANTES                                | CCL5, SISd                        |
| E3, E4   | SDF-1                                 | CXCL12, PBSF                      |
| E5, E6   | Complement Factor D (Sample Control)* | Adipsin, DF, Adn                  |
| E7, E8   | gp130 (Sample Control)*               | IL-6ST, CD130                     |
| E9, E10  | HSP60 (Sample Control)*               | Hspd1                             |
| E11, E12 | Negative Control N/A                  | Control (-)                       |
| F1, F2   | Reference Spots                       | RS                                |



**Supplementary Table S3. Clinico-pathological information for patients sample (paraffin section)**

| <b>Assigned ID</b> | <b>Site</b>          | <b>Days From Dx to Met</b> | <b>Days From Dx to Censor</b> | <b>Days From Met to Censor</b> | <b>Dead (1=yes, 0=no)</b> | <b>Treatment</b>                                                                                                         | <b>Response</b> |
|--------------------|----------------------|----------------------------|-------------------------------|--------------------------------|---------------------------|--------------------------------------------------------------------------------------------------------------------------|-----------------|
| 1                  | right femoral head   | Unknown                    | Unknown                       | 240                            | 0                         | Radiation to prostate prior to metastasis. No other records available                                                    | progression     |
| 2                  | right proximal femur | 63                         | 539                           | 476                            | 0                         | Docetaxel x 6 cycles, palliative radiation to the hip, leuprolide, denosumab                                             | stable          |
| 3                  | right femoral head   | 39994                      | 40167                         | 173                            | 0                         | Radiation to the spine for metastasis seen on imaging, leuprolide                                                        | unknown         |
| 4                  | right proximal femur | 0                          | 13                            | 13                             | 0                         | Unknown                                                                                                                  | unknown         |
| 5                  | left femur           | 0                          | 281                           | 281                            | 1                         | Bicalutamide, leuprolide, palliative radiation of spine                                                                  | progression     |
| 6                  | left femoral head    | 2382                       | 2652                          | 270                            | 0                         | Leuprolide, Triptorelin, bicalutamide, enzalutamide                                                                      | progression     |
| 7                  | left femur           | 40644                      | 40687                         | 43                             | 0                         | brachytherapy, bicalutamide, leuprolide, zoledronic acid, denosumab, radiotherapy, abiraterone, prednisone, enzalutamide | unknown         |
| 8                  | right femur          | 1690                       | 1958                          | 268                            | 0                         | Unknown                                                                                                                  | unknown         |
| 9                  | left proximal femur  | 0                          | 273                           | 273                            | 0                         | Bicalutamide, enzalutamide, docetaxel, ramucirumab                                                                       | progression     |

|    |                      |      |      |      |   |                                                                                                                             |             |
|----|----------------------|------|------|------|---|-----------------------------------------------------------------------------------------------------------------------------|-------------|
| 10 | right proximal femur | 0    | 450  | 450  | 0 | Docetaxel, leuprolide, radiation to femur                                                                                   | stable      |
| 11 | left femoral head    | 2556 | 3216 | 660  | 0 | Unknown                                                                                                                     | stable      |
| 12 | right femur          | 768  | 870  | 102  | 0 | Abiraterone, prednisone, enzalutamide, radiation                                                                            | progression |
| 13 | T10                  | 0    | 310  | 310  | 0 | Radiation to C and T spine, bicalutamide, docetaxel 6 cycles, and leuprolide                                                | stable      |
| 14 | T11                  | 0    | 318  | 318  | 1 | Palliative radiation to pelvis and sacrum, docetaxel, androgen deprivation therapy                                          | progression |
| 15 | T2                   | 3147 | 4418 | 1271 | 0 | Radical prostatectomy and lymph node sampling, docetaxel, abiraterone, prednisone, leuprolide, triptorelin, zoledronic acid | stable      |
| 16 | L5                   | 61   | 540  | 479  | 1 | Bicalutamide, leuprolide, enzalutamide, radiation to lumbosacral spine                                                      | progression |
| 17 | T spine, NOS         | 0    | 686  | 686  | 0 | Radiation to thoracic spine following fusion and laminectomies, androgen deprivation therapy, abiraterone, docetaxel        | progression |
| 18 | L3                   | 33   | 69   | 36   | 1 | Radiation to cervical and thoracic spine and leuprolide                                                                     | progression |
| 19 | L4                   | 39   | 115  | 76   | 1 | Radiation to lumbar spine, leuprolide, docetaxel                                                                            | progression |
| 20 | T spine, NOS         | 0    | 726  | 726  | 0 | Bicalutamide, leuprolide                                                                                                    | progression |
| 21 | T spine, NOS         | 0    | 757  | 757  | 0 | Resection of mass, bicalutamide, abiraterone, prednisone, leuprolide                                                        | progression |
| 22 | T11                  | 1105 | 1192 | 87   | 0 | Unknown                                                                                                                     | progression |
| 23 | T2                   | 0    | 2233 | 2233 | 0 | Radiation to C and T spine, bicalutamide, ketoconazole, prednisone, docetaxel                                               | stable      |
| 24 | T2                   | 3500 | 3625 | 125  | 0 | Prostatectomy and radiation to T spine metastasis 9 years                                                                   | unknown     |

|    |                 |   |      |      |   |                                                                                                                      |        |
|----|-----------------|---|------|------|---|----------------------------------------------------------------------------------------------------------------------|--------|
|    |                 |   |      |      |   | after original diagnosis. Received chemotherapy at initial diagnosis. Not known if patient received prior radiation. |        |
| 25 | C spine,<br>NOS | 0 | 1401 | 1401 | 0 | Androgen deprivation therapy, docetaxel, bicalutamide                                                                | stable |



**Supplementary Table S4: Sample details for Serum sample (Obtained from Eastern Virginia Medical School, Norfolk, VA)**

| Sample ID | Clinical Stage T | Clinical Gleason Score | Pathological Stage T | Path Gleason Score |
|-----------|------------------|------------------------|----------------------|--------------------|
| 1         | cT0              | 0                      |                      |                    |
| 2         | cT0              | 0                      |                      |                    |
| 3         | cT0              | 0                      |                      |                    |
| 4         | T2c              | 7                      | pT3b                 | 7                  |
| 5         | T2B              | 6                      | pT3c                 | 7                  |
| 6         | cT0              | 0                      |                      |                    |
| 7         | cT0              | 0                      |                      |                    |
| 8         | T2a              | 7                      | pT3b                 | 7                  |
| 9         | T2b              | 5                      | pT3b                 | 5                  |
| 10        | T2c              | 7                      | pT3b                 | 7                  |
| 11        | cT0              | 0                      |                      |                    |
| 12        | cT0              | 0                      |                      |                    |
| 13        | T2b              | 9                      | pT3b                 | 8                  |
| 14        | T1c              | 8                      | pT3b                 | 7                  |
| 15        | cT0              | 0                      |                      |                    |
| 16        | T2b              | 7                      | pT3b                 | 7                  |
| 17        | T1c              | 7                      | pT3b                 | 7                  |
| 18        | cT0              | 0                      |                      |                    |
| 19        | T1c              | 7                      | pT3b                 | 7                  |
| 20        | cT0              | 0                      |                      |                    |
| 21        | T2a              | 6                      | pT3b                 | 6                  |

|    |         |   |      |   |
|----|---------|---|------|---|
| 22 | T1c     | 6 | pT3b | 7 |
| 23 | Benign  | 0 |      |   |
| 24 | Atrophy | 0 |      |   |
| 25 | Benign  | 0 |      |   |
| 26 | Atrophy | 0 |      |   |
| 27 | Benign  | 0 |      |   |
| 28 | Atrophy | 0 |      |   |
| 29 | Atrophy | 0 |      |   |
| 30 | Atrophy | 0 |      |   |
| 31 | T1c     | 6 | pT3b | 7 |
| 32 | T2a     | 8 | pT3b | 8 |
| 33 | T2a     | 7 | pT3b | 7 |
| 34 | Benign  | 0 |      |   |
| 35 | Benign  | 0 |      |   |
| 36 | T1c     | 6 | pT3b | 7 |
| 37 | T2a     | 8 | pT3b | 8 |
| 38 | T1c     | 7 | pT3b | 7 |
| 39 | T1c     | 9 | pT3b | 9 |
| 40 | T2b     | 7 | pT3b | 7 |

| Sample ID | Clinical Stage T | Clinical Gleason Score | Pathological Stage T | Path Gleason Score | Bone Metastasis    |
|-----------|------------------|------------------------|----------------------|--------------------|--------------------|
| 41        | T1c              | 7                      | pT2c                 | 7                  | CT Scan            |
| 42        | T1c              | 6                      | pT2c                 | 7                  | Axumin Scan        |
| 43        | T1c              | 7                      | pT3b                 | 7                  | Bone Scan          |
| 44        | T1c              | 7                      | pT3a                 | 7                  | HORMONE REFRACTORY |
| 45        | T1c              | 7                      | pT2c                 | 7                  | Metastatic Disease |
| 46        | T1c              | 9                      | pT3b                 | 7                  | CT Scan            |
| 47        | T1c              | 6                      | pT2c                 | 7                  | Bone Scan          |
| 48        | T1c              | 8                      | pT2                  | 7                  | HORMONE REFRACTORY |
| 49        | T1c              | 6                      | pT2b                 | 7                  | Bone Scan          |
| 50        | T2b              | 7                      | pT3a                 | 7                  | Bone Scan          |
| 51        | T2a              | 6                      | pT4                  | 7                  | CT Scan            |
| 52        | T1a              | 6                      | pT2c                 | 7                  | X-Ray              |
| 53        | T1c              | 6                      | pT3a                 | 7                  | HORMONE REFRACTORY |
| 54        | T1c              | 6                      | pT3a                 | 7                  | Axumin Scan        |
| 55        | T2c              | 7                      | pT3b                 | 7                  | Bone Scan          |
| 56        | T2a              | 6                      | pT2c                 | 7                  | Bone Scan          |
| 57        | T1b              | 7                      | pT3b                 | 7                  | Bone Scan          |
| 58        | T2b              | 7                      | pT3a                 | 7                  | MRI                |
| 59        | T2a              | 7                      | pT3a                 | 7                  | Bone Scan          |
| 60        | T1c              | 6                      | pT2c                 | 7                  | PET/CT Scan        |
